# Supplementary material for: Construction of a new smooth support vector machine model and its application in heart disease diagnosis
Source: PubMed Central journal article supplement (PMC9910651; doi:10.1371/journal.pone.0280804), 2023-02-09
Supplement: pone.0280804.s003.pdf [file pone.0280804.s003.pdf]

**S1 Table. Approximation accuracy of different smooth functions and the convergence rate of the model.**

| Smooth support<br>vector machine<br>(SSVM) | Smooth function<br>$f_{smooth}(x, k)$                                                                                                                                                                                                                   | Approximation<br>accuracy<br>$f_{smooth}(x, k)^2 - x_+^2 \leq$ | Convergence<br>speed<br>$\ \bar{x}^k - \bar{x}\ _2^2 \leq$ |
|--------------------------------------------|---------------------------------------------------------------------------------------------------------------------------------------------------------------------------------------------------------------------------------------------------------|----------------------------------------------------------------|------------------------------------------------------------|
| Sigmoid-SSVM                               | $x + \frac{1}{k} \log(1 + e^{-kx})$                                                                                                                                                                                                                     | $0.6927/k^2$                                                   | $0.3463m/k^2$                                              |
| P2-SSVM                                    | $\frac{k}{4}x^2 + \frac{x}{2} + \frac{1}{4k}$                                                                                                                                                                                                           | $0.0909/k^2$                                                   | $0.0455m/k^2$                                              |
| P4-SSVM                                    | $-\frac{1}{16k}(kx+1)^3(kx-3)$                                                                                                                                                                                                                          | $0.0526/k^2$                                                   | $0.0263m/k^2$                                              |
| T3-SSVM                                    | $\begin{cases} \frac{k^2}{6}x^3 + \frac{k}{2}x^2 + \frac{1}{2}x + \frac{1}{6k}, -\frac{1}{k} < x < 0 \\ -\frac{k^2}{6}x^3 + \frac{k}{2}x^2 + \frac{1}{2}x + \frac{1}{6k}, 0 \leq x < \frac{1}{k} \end{cases}$                                           | $0.04167/k^2$                                                  | $0.0208m/k^2$                                              |
| T5-SSVM                                    | $\begin{cases} -\frac{k^4}{10}x^5 - \frac{k^3}{4}x^4 + \frac{k}{2}x^2 + \frac{1}{2}x + \frac{3}{20k}, -\frac{1}{k} < x < 0 \\ \frac{k^4}{10}x^5 - \frac{k^3}{4}x^4 + \frac{k}{2}x^2 + \frac{1}{2}x + \frac{3}{20k}, 0 \leq x < \frac{1}{k} \end{cases}$ | $0.03333/k^2$                                                  | $0.0167m/k^2$                                              |
| Padé22-SSVM                                | $\frac{1}{2k} \cdot \frac{1+10k^2x^2+5k^4x^4}{5+10k^2x^2+k^4x^4} + \frac{x}{2}$                                                                                                                                                                         | $0.0139/k^2$                                                   | $0.0069m/k^2$                                              |
| Padé33-SSVM                                | $\frac{7(1-k^2x^2)^3 - 56(1-k^2x^2)^2 + 112(1-k^2x^2) - 64}{2k((1-k^2x^2)^3 - 24(1-k^2x^2)^2 + 80(1-k^2x^2) - 64)} + \frac{x}{2}$                                                                                                                       | $0.0051/k^2$                                                   | $0.0026m/k^2$                                              |
