# Supplementary material for: Construction of a new smooth support vector machine model and its application in heart disease diagnosis
Source: PubMed Central journal article supplement (PMC9910651; doi:10.1371/journal.pone.0280804), 2023-02-09
Supplement: pone.0280804.s004.pdf [file pone.0280804.s004.pdf]

**S2 Table. Comparison of different SSVMs with SVM and LSSVM at different scales.**

| SSVM               | performance | Classification | CPU          | Classification | CPU          |
|--------------------|-------------|----------------|--------------|----------------|--------------|
|                    |             | accuracy       | Training     | accuracy       | Training     |
|                    |             | (percentage)   | time (s)     | (percentage)   | time (s)     |
|                    |             | M=130          |              | M=270          |              |
| SVM                |             | 83.850         | 6.817        | 85.560         | 10.043       |
| LSSVM              |             | 81.539         | 0.032        | 84.815         | 0.055        |
| Sigmoid-SSVM       |             | 83.077         | 0.089        | 84.074         | 0.943        |
| P2-SSVM            |             | 84.184         | 0.073        | 84.444         | 0.686        |
| P4-SSVM            |             | 84.444         | 0.032        | 84.815         | 0.751        |
| S3-SSVM            |             | 84.615         | 0.089        | 85.185         | 0.689        |
| S5-SSVM            |             | 84.615         | 0.069        | 85.185         | 0.670        |
| Padé22-SSVM        |             | 84.615         | 0.074        | 85.556         | 0.517        |
| <b>Padé33-SSVM</b> |             | <b>85.556</b>  | <b>0.059</b> | <b>86.296</b>  | <b>0.462</b> |
