# Supplementary material for: Construction of a new smooth support vector machine model and its application in heart disease diagnosis
Source: PubMed Central journal article supplement (PMC9910651; doi:10.1371/journal.pone.0280804), 2023-02-09
Supplement: pone.0280804.s005.pdf [file pone.0280804.s005.pdf]

**S3 Table. Classification and test comparison of padé33-SSVM under different training sample functions.**

| samples | $C = 2$ |         | $C = 4$ |         | $C = 10$ |         | $C = 16$ |         | $C = 20$ |         |
|---------|---------|---------|---------|---------|----------|---------|----------|---------|----------|---------|
|         | Train   | Predict | Train   | Predict | Train    | Predict | Train    | Predict | Train    | Predict |
| 10      | 100     | 65.385  | 100     | 65      | 100      | 65.769  | 100      | 66.154  | 100      | 65.769  |
|         | 0.088   | 0.025   | 0.112   | 0.028   | 0.352    | 0.028   | 0.319    | 0.028   | 0.228    | 0.026   |
| 30      | 96.667  | 69.167  | 100     | 67.5    | 100      | 69.583  | 100      | 69.583  | 100      | 69.583  |
|         | 0.104   | 0.027   | 0.153   | 0.026   | 0.285    | 0.030   | 0.474    | 0.029   | 0.472    | 0.036   |
| 50      | 96      | 75.909  | 96      | 74.546  | 96       | 74.546  | 98       | 75      | 98       | 74.091  |
|         | 0.133   | 0.016   | 0.142   | 0.025   | 0.197    | 0.023   | 0.223    | 0.033   | 0.376    | 0.023   |
| 70      | 88.571  | 79.5    | 88.571  | 79      | 92.857   | 77      | 91.429   | 76.5    | 91.429   | 77.5    |
|         | 0.127   | 0.028   | 0.105   | 0.016   | 0.166    | 0.027   | 0.218    | 0.017   | 0.246    | 0.026   |
| 90      | 88.889  | 81.111  | 90      | 80.556  | 90       | 78.889  | 90       | 78.333  | 90       | 78.889  |
|         | 0.127   | 0.014   | 0.162   | 0.021   | 0.227    | 0.033   | 0.179    | 0.027   | 0.266    | 0.033   |
| 130     | 85.385  | 82.143  | 85.385  | 82.143  | 86.154   | 82.143  | 86.154   | 81.429  | 86.154   | 81.429  |
|         | 0.203   | 0.020   | 0.219   | 0.034   | 0.297    | 0.032   | 0.237    | 0.026   | 0.417    | 0.023   |
| 150     | 86      | 82.5    | 86.667  | 82.5    | 86.667   | 82.5    | 85.333   | 81.667  | 85.333   | 81.833  |
|         | 0.251   | 0.021   | 0.291   | 0.013   | 0.316    | 0.017   | 0.355    | 0.013   | 0.418    | 0.017   |
| 210     | 88.095  | 83.333  | 87.619  | 83.333  | 88.095   | 81.667  | 88.095   | 81.667  | 87.619   | 81.667  |
|         | 0.370   | 0.013   | 0.448   | 0.009   | 0.483    | 0.014   | 0.471    | 0.017   | 0.528    | 0.022   |
| 240     | 86.667  | 86.667  | 86.667  | 86.667  | 86.25    | 86.667  | 86.25    | 86.667  | 86.25    | 86.667  |
|         | 0.490   | 0.010   | 0.686   | 0.017   | 0.678    | 0.031   | 0.869    | 0.014   | 1.046    | 0.017   |
