# Supplementary material for: Construction of a new smooth support vector machine model and its application in heart disease diagnosis
Source: PubMed Central journal article supplement (PMC9910651; doi:10.1371/journal.pone.0280804), 2023-02-09
Supplement: pone.0280804.s006.pdf [file pone.0280804.s006.pdf]

**S4 Table. Comparison of different SSVMS with SVM and LSSVM in different data sets.**

| Performance<br>Data sets<br>SSVM | Banknote<br>=1372*4        | EEG<br>=1500*20            | QSAR<br>=1055*41           | Crowdsourced<br>=2000*28   | Diabetic<br>=1151*20       |
|----------------------------------|----------------------------|----------------------------|----------------------------|----------------------------|----------------------------|
| SVM                              | 90.690<br>(336.294)        | 62.330<br>(485.430)        | 85.010<br>(1863.9)         | 92.900<br>(5655.1)         | 69.750<br>(3531.0)         |
| LSSVM                            | 87.670<br>(353.127)        | 61.470<br>(0.912)          | 82.200<br>(3.134)          | 92.100<br>(2.108)          | 63.330<br>(1.348)          |
| Sigmoid-SSVM                     | 88.484<br>(353.127)        | 61.000<br>(283.030)        | 83.212<br>(279.697)        | 89.850<br>(853.942)        | 57.863<br>(254.657)        |
| P2-SSVM                          | 88.484<br>(299.069)        | 61.733<br>(243.039)        | 83.318<br>(280.922)        | 91.150<br>(879.012)        | 60.016<br>(256.051)        |
| P4-SSVM                          | 88.776<br>(297.164)        | 62.000<br>(273.971)        | 83.697<br>(285.665)        | 91.350<br>(927.105)        | 60.035<br>(255.993)        |
| T3-SSVM                          | 88.921<br>(294.272)        | 62.133<br>(244.845)        | 83.697<br>(342.235)        | 91.250<br>(899.858)        | 64.987<br>(256.087)        |
| T5-SSVM                          | 88.994<br>(298.486)        | 62.133<br>(245.261)        | 83.886<br>(311.801)        | 91.350<br>(939.453)        | 64.992<br>(256.884)        |
| Padé22-SSVM                      | 89.723<br>(295.753)        | 62.333<br>(250.239)        | 84.171<br>(396.057)        | 92.200<br>(852.956)        | 65.682<br>(256.969)        |
| <b>Padé33-SSVM</b>               | <b>89.923</b><br>(276.532) | <b>62.415</b><br>(228.632) | <b>84.435</b><br>(280.362) | <b>92.200</b><br>(836.634) | <b>68.215</b><br>(250.351) |
